# Supplementary material
Source: PubMed Central journal article supplement (PMC8405180)

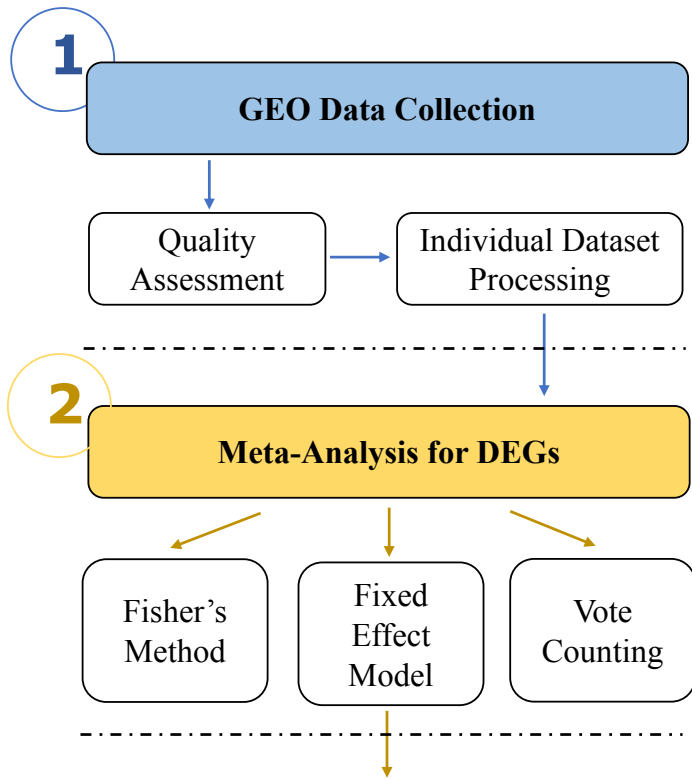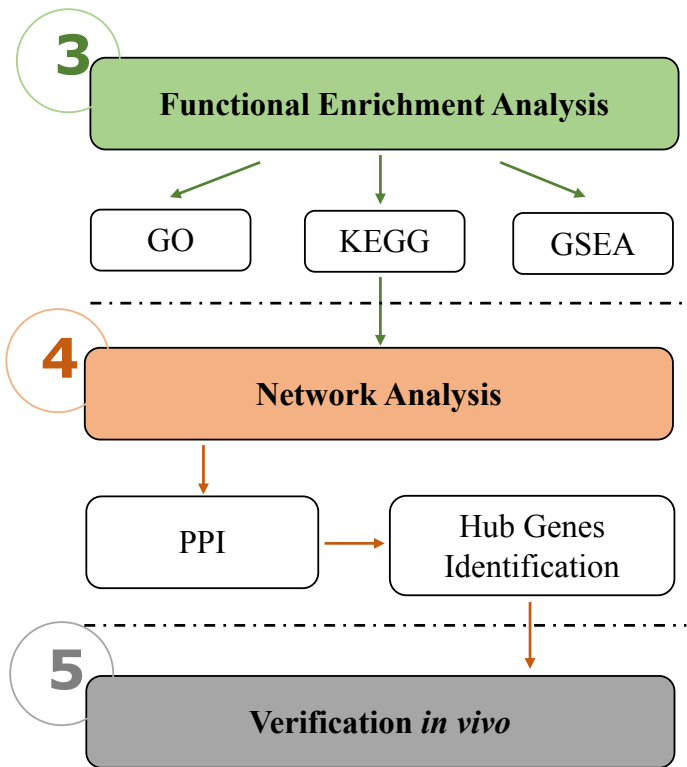

Supplement: 10753_2021_1518_MOESM2_ESM.pdf [file 10753_2021_1518_MOESM2_ESM.pdf]
